# Supplementary material for: Bifunctional Cu(ii)-based 2D coordination polymer and its composite for high-performance photocatalysis and electrochemical energy storage
Source: Royal Society of Chemistry journal article supplement (doi:10.1039/d3dt01691a), 2023-01-01
Supplement: d3dt01691a1.pdf [file d3dt01691a1.pdf]

## Bifunctional Cu(II)-based 2D Coordination Polymer and its Composite for High Performance Electrochemical Energy Storage Application

**Authors:** Arif Ali<sup>a</sup>, Waris<sup>b</sup>, Basree<sup>a</sup>, Mohd Zain Khan<sup>b</sup>, Necmi Dege<sup>c</sup>, Musheer Ahmad<sup>a\*</sup>, M. Shahid<sup>d\*</sup>

<sup>a</sup>*Department of Applied Chemistry, ZHCET, Faculty of Engineering and Technology, Aligarh Muslim University Aligarh, U.P. India 202002*

<sup>b</sup>*Industrial Chemistry Research Laboratory, Department of Industrial Chemistry, Faculty of Science, Aligarh Muslim University Aligarh, U.P. India 202002*

<sup>c</sup>*Ondokuz Mayıs University, Arts and Sciences Faculty, Department of Physics, Atakum 55139, Samsun, Turkey*

<sup>d</sup>*Functional Inorganic Materials Lab (FIML), Department of Chemistry, Aligarh Muslim University, Aligarh 202002, India*

| <b>Table S1. Crystal data and structure refinement for CP-1.</b> |                                                                  |
|------------------------------------------------------------------|------------------------------------------------------------------|
| <b>CCDC NO.</b>                                                  | <b>2165040</b>                                                   |
| Identification code                                              | CP-1                                                             |
| Empirical formula                                                | C <sub>9</sub> H <sub>11</sub> ClCu <sub>2</sub> O <sub>10</sub> |
| Formula weight                                                   | 441.726                                                          |
| Temperature/K                                                    | 100(2)                                                           |
| Crystal system                                                   | orthorhombic                                                     |
| Space group                                                      | <i>Cmce</i>                                                      |
| a/Å                                                              | 28.8070(12)                                                      |
| b/Å                                                              | 28.1264(12)                                                      |
| c/Å                                                              | 7.3819(3)                                                        |
| α/°                                                              | 90                                                               |
| β/°                                                              | 90                                                               |
| γ/°                                                              | 90                                                               |
| Volume/Å <sup>3</sup>                                            | 5981.1(4)                                                        |
| Z                                                                | 16                                                               |
| ρ <sub>calc</sub> /g/cm <sup>3</sup>                             | 1.962                                                            |

|                                                |                                                               |
|------------------------------------------------|---------------------------------------------------------------|
| $\mu/\text{mm}^{-1}$                           | 3.069                                                         |
| F(000)                                         | 3535.9                                                        |
| Crystal size/ $\text{mm}^3$                    | $0.53 \times 0.27 \times 0.19$                                |
| Radiation                                      | Mo K $\alpha$ ( $\lambda = 0.71073$ )                         |
| $2\Theta$ range for data collection/ $^\circ$  | 5.66 to 56.58                                                 |
| Index ranges                                   | $-38 \leq h \leq 38, -37 \leq k \leq 37, -9 \leq l \leq 9$    |
| Reflections collected                          | 44702                                                         |
| Independent reflections                        | 3789 [ $R_{\text{int}} = 0.0560, R_{\text{sigma}} = 0.0229$ ] |
| Data/restraints/parameters                     | 3789/0/204                                                    |
| Goodness-of-fit on $F^2$                       | 1.090                                                         |
| Final R indexes [ $I \geq 2\sigma(I)$ ]        | $R_1 = 0.0555, wR_2 = 0.1406$                                 |
| Final R indexes [all data]                     | $R_1 = 0.0692, wR_2 = 0.1534$                                 |
| Largest diff. peak/hole / $e \text{ \AA}^{-3}$ | 1.40/-1.23                                                    |

**Table S2. Fractional Atomic Coordinates ( $\times 10^4$ ) and Equivalent Isotropic Displacement Parameters ( $\text{\AA}^2 \times 10^3$ ) for CP-1.  $U_{\text{eq}}$  is defined as 1/3 of the trace of the orthogonalised  $U_{ij}$  tensor.**

| Atom | <i>x</i>   | <i>y</i>   | <i>z</i>   | $U(\text{eq})$ |
|------|------------|------------|------------|----------------|
| Cu1  | 6780.8(3)  | 661.5(3)   | 2718.0(10) | 12.3(2)        |
| Cu2  | 5721.8(2)  | 3160.2(2)  | 2899.3(9)  | 8.8(2)         |
| Cl1  | 7500       | 45.7(7)    | 2500       | 11.8(4)        |
| Cl2  | 5000       | 2547.7(7)  | 2885(3)    | 8.3(4)         |
| O1   | 7130.0(16) | 1255.0(16) | 2981(8)    | 24.4(11)       |
| O2   | 6263.0(13) | 2721.2(14) | 2847(6)    | 9.3(8)         |
| O3   | 6615.3(15) | 3426.0(15) | 2797(6)    | 14.0(9)        |
| O4   | 6742.0(18) | 648.1(18)  | 5403(7)    | 24.5(11)       |
| O5   | 6789.9(18) | 687.8(19)  | 13(8)      | 29.1(12)       |
| O6   | 5742.1(18) | 3158.8(18) | 5593(6)    | 24.1(10)       |
| O7   | 5736.1(18) | 3172.0(19) | 188(7)     | 26.6(11)       |
| O8   | 5385.3(17) | 3766.0(16) | 2948(8)    | 25.6(12)       |
| O9   | 6239.8(15) | 5227.2(15) | 2428(6)    | 13.2(9)        |
| O10  | 5885.9(15) | 5930.2(15) | 2201(6)    | 13.6(9)        |
| C1   | 7500       | 1450(3)    | 2500       | 10.3(16)       |
| C2   | 7500       | 1984(3)    | 2500       | 7.7(15)        |
| C3   | 7086(2)    | 2229(2)    | 2664(7)    | 7.5(11)        |
| C4   | 7081.8(19) | 2725.1(19) | 2656(7)    | 7.3(10)        |
| C5   | 7500       | 2976(3)    | 2500       | 6.7(8)         |
| C6   | 6628(2)    | 2984(2)    | 2792(8)    | 10.6(11)       |
| C7   | 5000       | 3956(3)    | 2850(10)   | 7.7(14)        |
| C8   | 5000       | 4487(3)    | 2697(10)   | 6.7(8)         |

**Table S2. Fractional Atomic Coordinates ( $\times 10^4$ ) and Equivalent Isotropic Displacement Parameters ( $\text{\AA}^2 \times 10^3$ ) for CP-1.  $U_{\text{eq}}$  is defined as 1/3 of the trace of the orthogonalised  $U_{ij}$  tensor.**

| Atom | $x$        | $y$     | $z$      | $U(\text{eq})$ |
|------|------------|---------|----------|----------------|
| C9   | 5416.3(19) | 4736(2) | 2606(7)  | 9.4(10)        |
| C10  | 5419(2)    | 5233(2) | 2428(7)  | 7.3(11)        |
| C11  | 5875(2)    | 5489(2) | 2335(8)  | 11.4(11)       |
| C12  | 5000       | 5476(3) | 2340(10) | 6.7(8)         |

**Table S3. Anisotropic Displacement Parameters ( $\text{\AA}^2 \times 10^3$ ) for CP-1. The Anisotropic displacement factor exponent takes the form:  $-2\pi^2[h^2a^*U_{11}+2hka^*b^*U_{12}+\dots]$ .**

| Atom | $U_{11}$ | $U_{22}$ | $U_{33}$ | $U_{12}$ | $U_{13}$ | $U_{23}$ |
|------|----------|----------|----------|----------|----------|----------|
| Cu1  | 7.5(3)   | 7.3(4)   | 22.1(4)  | -1.5(3)  | 1.4(3)   | 1.5(3)   |
| Cu2  | 6.3(3)   | 6.1(3)   | 14.0(4)  | 1.6(3)   | -0.2(2)  | 0.5(2)   |
| Cl1  | 9.8(9)   | 9.5(9)   | 16.1(10) | -0       | 0.8(7)   | 0        |
| Cl2  | 7.1(8)   | 7.2(8)   | 10.5(8)  | -0       | -0       | -1.1(6)  |
| O1   | 13(2)    | 7(2)     | 52(3)    | -4.8(18) | 11(2)    | -3(2)    |
| O2   | 4.5(18)  | 7.7(19)  | 16(2)    | 0.6(15)  | 2.8(14)  | -3.0(15) |
| O3   | 11(2)    | 8(2)     | 23(2)    | 3.7(16)  | -0.9(17) | -0.4(16) |
| O4   | 26(3)    | 21(2)    | 27(3)    | -1(2)    | 0(2)     | -2(2)    |
| O5   | 25(3)    | 22(3)    | 41(3)    | 3(2)     | 4(2)     | 6(2)     |
| O6   | 28(3)    | 22(2)    | 23(2)    | -2(2)    | 2(2)     | -3.1(19) |
| O7   | 26(3)    | 26(3)    | 28(3)    | -8(2)    | -8(2)    | 6(2)     |
| O8   | 14(2)    | 7(2)     | 56(4)    | 2.2(18)  | -1(2)    | 2(2)     |
| O9   | 9(2)     | 10(2)    | 21(2)    | -1.6(17) | 1.1(16)  | 0.8(16)  |
| O10  | 12(2)    | 6(2)     | 22(2)    | 0.4(17)  | -1.0(17) | 0.6(16)  |
| C1   | 15(4)    | 4(4)     | 12(4)    | -0       | 0(3)     | 0        |
| C2   | 7(4)     | 6(4)     | 10(4)    | -0       | 1(3)     | 0        |
| C3   | 6(3)     | 9(3)     | 8(2)     | -1(2)    | 0.7(19)  | -1.5(19) |
| C4   | 7(2)     | 10(3)    | 5(2)     | 1(2)     | 1.3(18)  | -0.7(18) |
| C5   | 11.2(19) | 5.8(18)  | 3.1(19)  | -0       | 1(3)     | 0        |
| C6   | 9(3)     | 7(3)     | 16(3)    | 3(2)     | 3(2)     | -1(2)    |
| C7   | 8(4)     | 7(3)     | 8(3)     | -0       | -0       | 0(3)     |
| C8   | 11.2(19) | 5.8(18)  | 3.1(19)  | -0       | 1(3)     | 0        |
| C9   | 8(2)     | 13(3)    | 6(2)     | 3(2)     | -0.8(18) | -0.1(19) |
| C10  | 6(3)     | 9(3)     | 8(2)     | -3(2)    | 0.5(18)  | -1.1(19) |
| C11  | 6(3)     | 11(3)    | 18(3)    | -2(2)    | 3(2)     | -1(2)    |
| C12  | 11.2(19) | 5.8(18)  | 3.1(19)  | -0       | 1(3)     | 0        |

**Table S4. Bond Lengths for CP-1.**

| Atom | Atom             | Length/Å   | Atom | Atom            | Length/Å  |
|------|------------------|------------|------|-----------------|-----------|
| Cu1  | Cl1 <sup>1</sup> | 2.7053(15) | O9   | C11             | 1.283(7)  |
| Cu1  | O1               | 1.959(5)   | O10  | C11             | 1.246(7)  |
| Cu1  | O4               | 1.985(5)   | C1   | C2              | 1.500(11) |
| Cu1  | O5               | 1.998(6)   | C2   | C3              | 1.382(7)  |
| Cu1  | O9 <sup>2</sup>  | 1.983(4)   | C2   | C3 <sup>1</sup> | 1.382(7)  |
| Cu2  | Cl2 <sup>3</sup> | 2.7004(14) | C3   | C4              | 1.397(7)  |
| Cu2  | O2               | 1.989(4)   | C4   | C5 <sup>1</sup> | 1.401(7)  |
| Cu2  | O6               | 1.989(5)   | C4   | C6              | 1.499(7)  |
| Cu2  | O7               | 2.002(5)   | C7   | C8              | 1.498(10) |
| Cu2  | O8               | 1.960(5)   | C8   | C9 <sup>3</sup> | 1.390(7)  |
| O1   | C1 <sup>1</sup>  | 1.251(6)   | C8   | C9              | 1.390(7)  |
| O2   | C6               | 1.287(7)   | C9   | C10             | 1.403(8)  |
| O3   | C6               | 1.244(7)   | C10  | C11             | 1.500(8)  |
| O8   | C7 <sup>3</sup>  | 1.234(6)   | C10  | C12             | 1.389(7)  |

<sup>1</sup>3/2-X,+Y,1/2-Z; <sup>2</sup>+X,-1/2+Y,1/2-Z; <sup>3</sup>1-X,+Y,+Z

**Table S5. Bond Angles for CP-1.**

| Atom            | Atom | Atom             | Angle/°    | Atom            | Atom | Atom            | Angle/°  |
|-----------------|------|------------------|------------|-----------------|------|-----------------|----------|
| O1              | Cu1  | Cl1 <sup>1</sup> | 99.10(15)  | C2              | C1   | O1 <sup>1</sup> | 116.1(4) |
| O4              | Cu1  | Cl1 <sup>1</sup> | 95.18(15)  | C2              | C1   | O1              | 116.1(4) |
| O4              | Cu1  | O1               | 86.9(2)    | C3 <sup>1</sup> | C2   | C1              | 119.9(4) |
| O5              | Cu1  | Cl1 <sup>1</sup> | 87.37(15)  | C3              | C2   | C1              | 119.9(4) |
| O5              | Cu1  | O1               | 93.5(2)    | C3              | C2   | C3 <sup>1</sup> | 120.3(8) |
| O5              | Cu1  | O4               | 177.3(2)   | C4              | C3   | C2 <sup>1</sup> | 120.3(6) |
| O9 <sup>2</sup> | Cu1  | Cl1 <sup>1</sup> | 101.79(13) | C5 <sup>1</sup> | C4   | C3              | 119.7(5) |
| O9 <sup>2</sup> | Cu1  | O1               | 159.07(19) | C6              | C4   | C3              | 119.6(5) |
| O9 <sup>2</sup> | Cu1  | O4               | 89.9(2)    | C6              | C4   | C5 <sup>1</sup> | 120.7(5) |
| O9 <sup>2</sup> | Cu1  | O5               | 88.8(2)    | C4              | C5   | C4 <sup>1</sup> | 119.6(7) |
| O2              | Cu2  | Cl2 <sup>3</sup> | 101.97(12) | O3              | C6   | O2              | 123.3(5) |
| O6              | Cu2  | Cl2 <sup>3</sup> | 91.45(15)  | C4              | C6   | O2              | 115.8(5) |
| O6              | Cu2  | O2               | 89.7(2)    | C4              | C6   | O3              | 120.8(5) |
| O7              | Cu2  | Cl2 <sup>3</sup> | 91.28(16)  | O8              | C7   | O8 <sup>3</sup> | 128.1(8) |
| O7              | Cu2  | O2               | 88.6(2)    | C8              | C7   | O8 <sup>3</sup> | 115.9(4) |
| O7              | Cu2  | O6               | 177.0(2)   | C8              | C7   | O8              | 115.9(4) |
| O8              | Cu2  | Cl2 <sup>3</sup> | 100.00(15) | C9 <sup>3</sup> | C8   | C7              | 120.4(4) |
| O8              | Cu2  | O2               | 158.03(18) | C9              | C8   | C7              | 120.4(4) |
| O8              | Cu2  | O6               | 89.9(2)    | C9              | C8   | C9 <sup>3</sup> | 119.2(7) |

**Table S5. Bond Angles for CP-1.**

| Atom            | Atom | Atom             | Angle/°   | Atom             | Atom | Atom            | Angle/°  |
|-----------------|------|------------------|-----------|------------------|------|-----------------|----------|
| O8              | Cu2  | O7               | 90.8(2)   | C10              | C9   | C8 <sup>3</sup> | 120.7(5) |
| Cu1             | Cl1  | Cu1 <sup>1</sup> | 100.38(7) | C11              | C10  | C9              | 119.1(5) |
| Cu2             | Cl2  | Cu2 <sup>3</sup> | 100.71(7) | C12              | C10  | C9              | 119.4(6) |
| C1 <sup>1</sup> | O1   | Cu1              | 141.7(5)  | C12              | C10  | C11             | 121.5(5) |
| C6              | O2   | Cu2              | 106.6(3)  | O10              | C11  | O9              | 123.7(6) |
| C7 <sup>3</sup> | O8   | Cu2              | 145.1(5)  | C10              | C11  | O9              | 116.1(5) |
| C11             | O9   | Cu1 <sup>4</sup> | 106.7(4)  | C10              | C11  | O10             | 120.2(5) |
| O1              | C1   | O1 <sup>1</sup>  | 127.9(8)  | C10 <sup>3</sup> | C12  | C10             | 120.7(7) |

<sup>1</sup>3/2-X,+Y,1/2-Z; <sup>2</sup>+X,-1/2+Y,1/2-Z; <sup>3</sup>1-X,+Y,+Z; <sup>4</sup>+X,1/2+Y,1/2-Z

**Table S6.** Apparent rate constant ( $k_{app}$ ), half-life time of reaction rate ( $t_{1/2}$ ), and corresponding correlation factor ( $R^2$ ) for degradation of MR dye over a CP-1 catalyst, an obtained value from the Langmuir Hinshelwood rate equation.

| CP-1                            |                                |                                |       |
|---------------------------------|--------------------------------|--------------------------------|-------|
| Parameters→<br>Catalyst amount↓ | $k_{app}$ (min <sup>-1</sup> ) | $t_{1/2}$ (min <sup>-1</sup> ) | $R^2$ |
| 5 mg                            | 0.03465                        | 20                             | 0.928 |
| 10 mg                           | 0.03773                        | 18.36                          | 0.946 |
| 20 mg                           | 0.06571                        | 10.54                          | 0.944 |

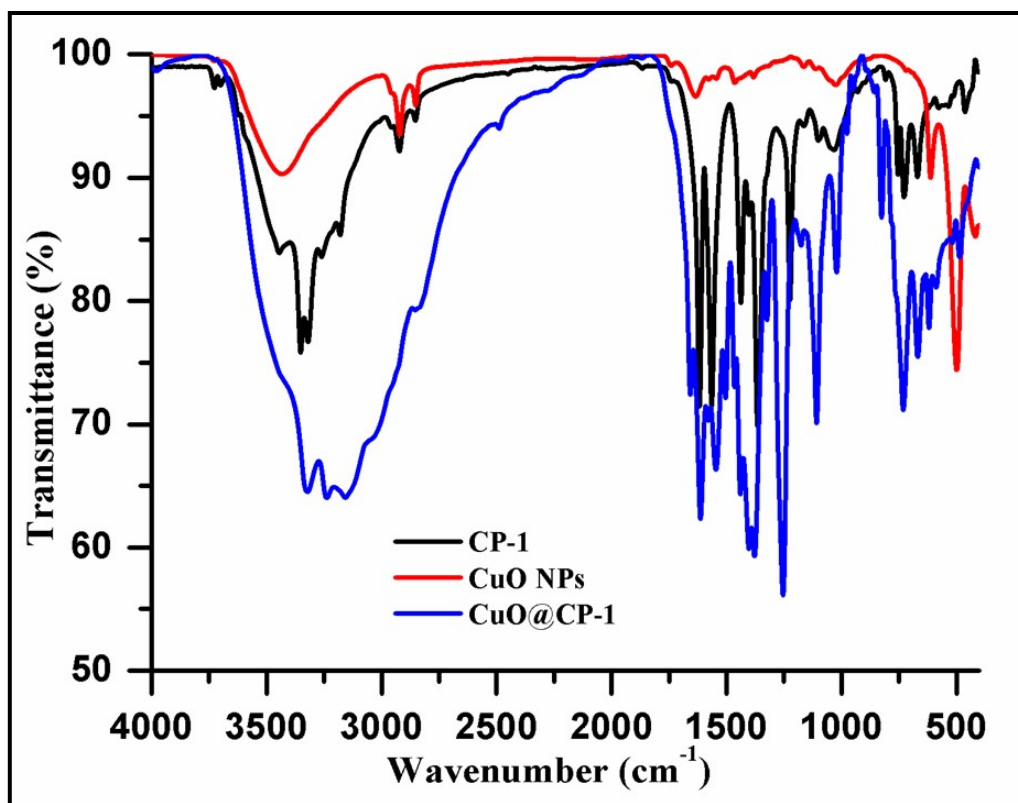

Figure S1. FTIR spectra of CP-1, CuO NPs and CuO@CP-1.

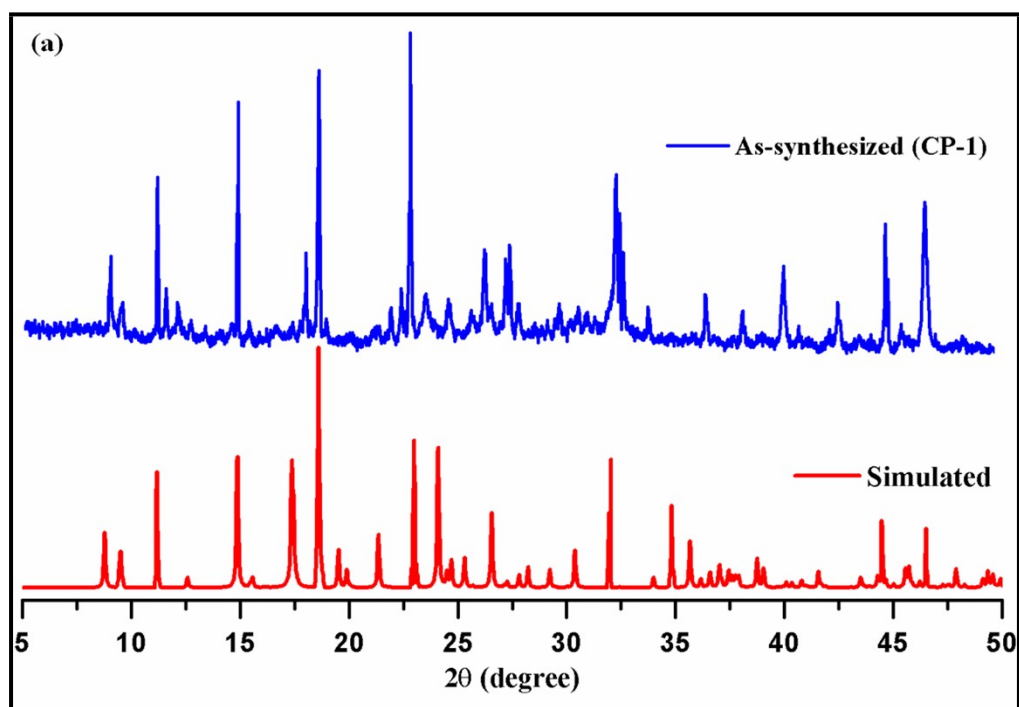

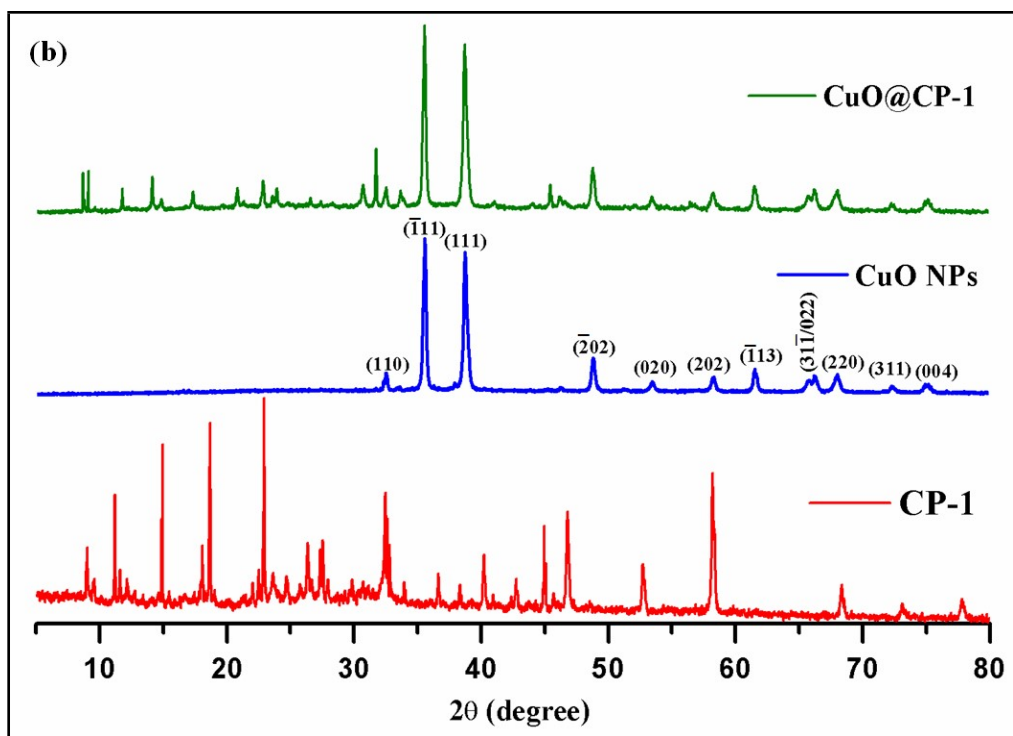

**Figure S2.** PXRD patterns (a) simulated of CP-1, as-synthesized CP-1, (b) As-synthesized CP-1, CuO NPs and CuO@CP-1.

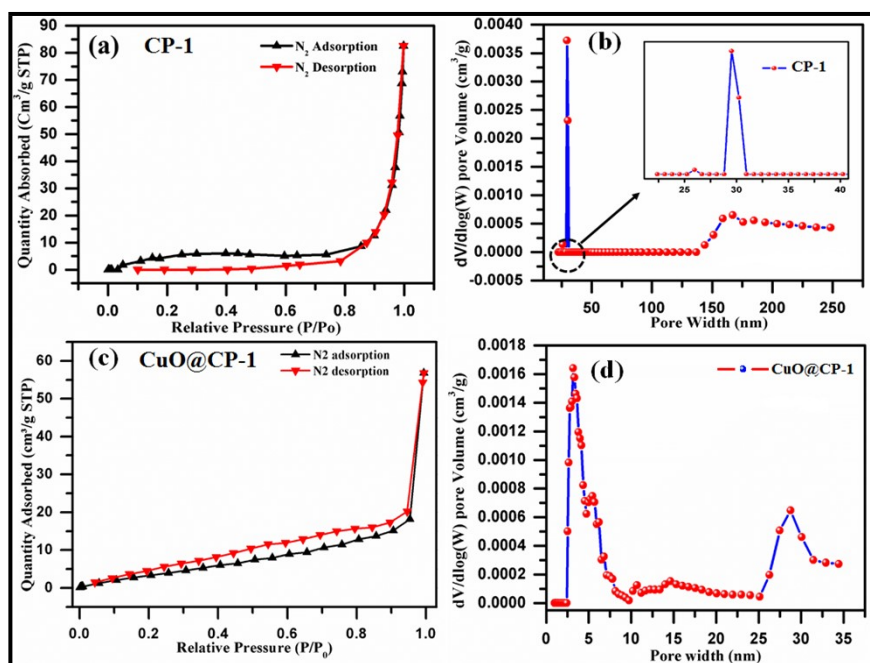

**Figure S3.** BET adsorption-desorption isotherm and BJH pore width distribution of N<sub>2</sub> at 77K: (a, b) for CP-1, and (c, d) for CuO@CP-1.

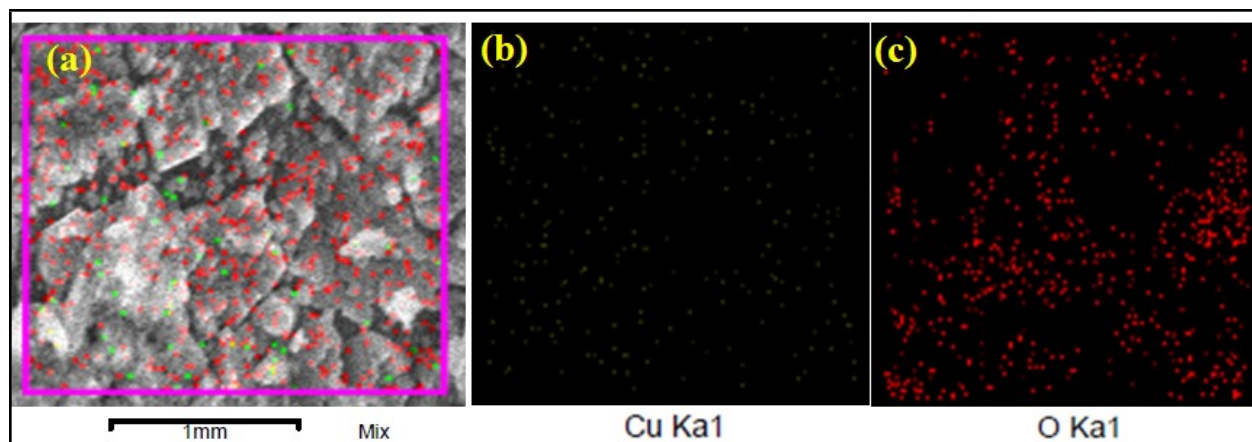

**Figure S4.** SEM images of CuO NPs on 1mm mixed selective area for elemental mapping (a-c).

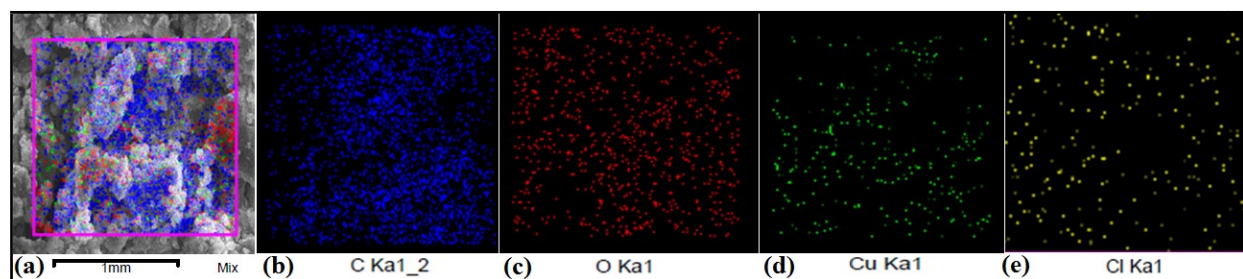

**Figure S5.** SEM images of CuO@CP-1 on 1mm mixed selective area for elemental mapping (a-e).

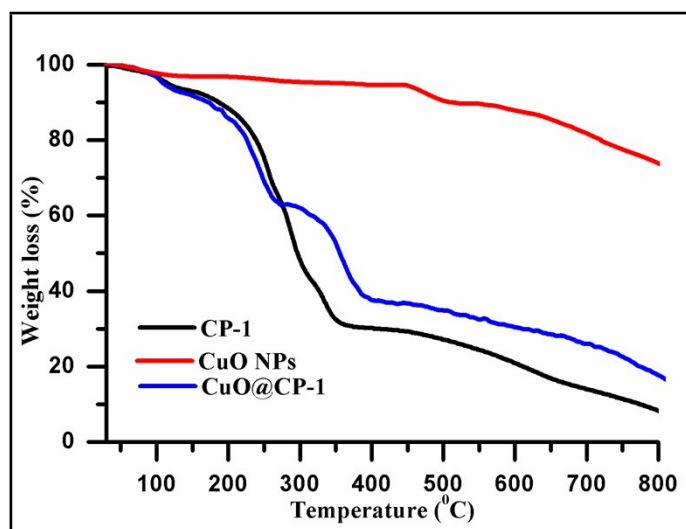

**Figure S6.** Thermogravimetric curves of as-synthesized coordination polymer (CP-1), nanoparticle (CuO) and composite (CuO@CP-1).



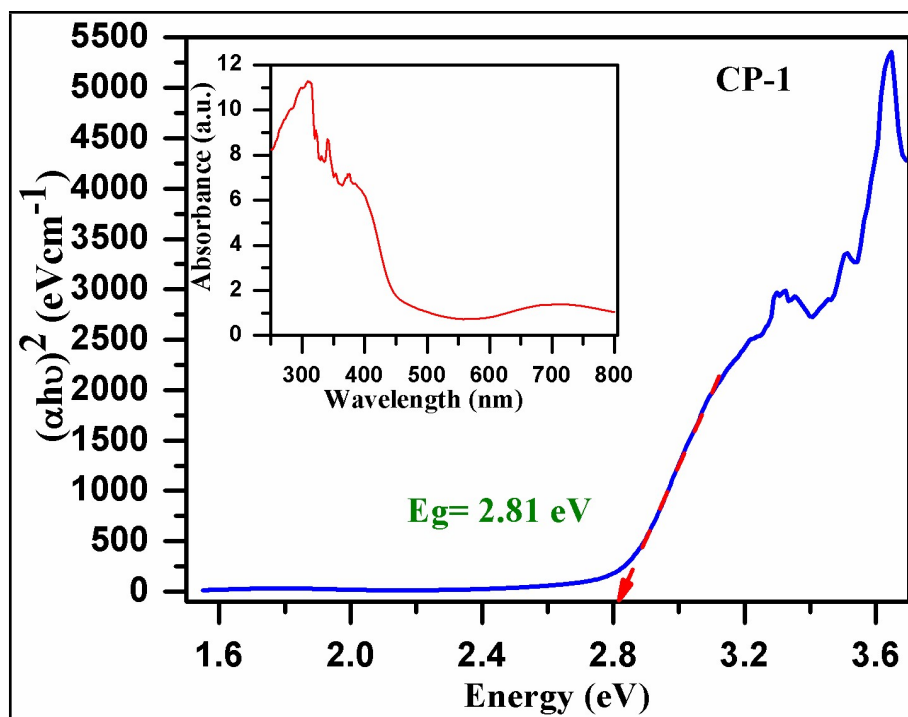

Figure S7. The experimental optical band gap of as-synthesized CP-1.

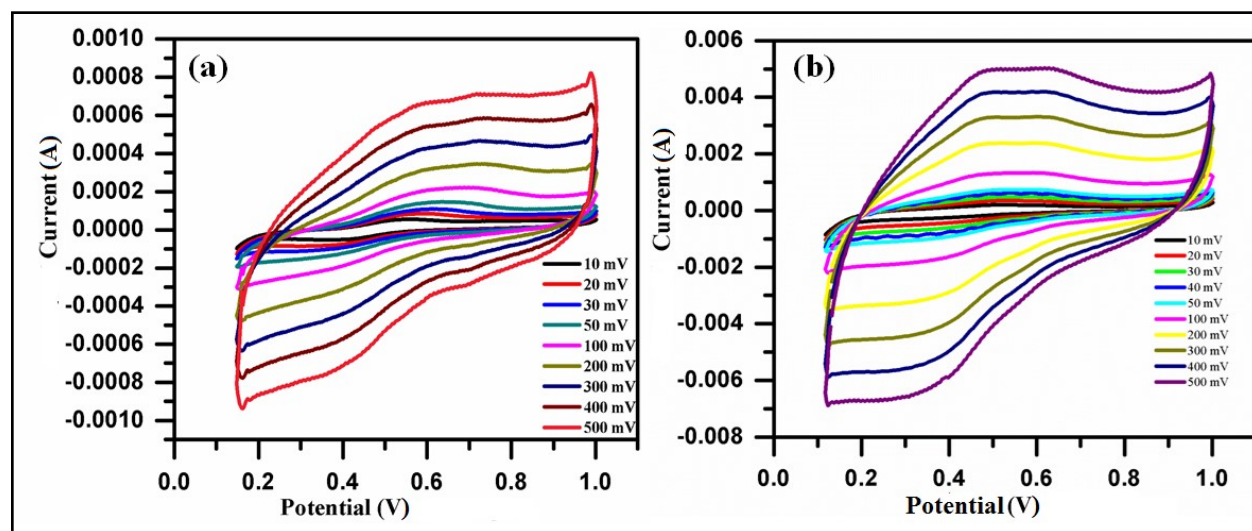

Figure S8. CV profiles of (a) CuO NPs, and (b) composite at different scan rates from 10-500  $\text{mVs}^{-1}$ .

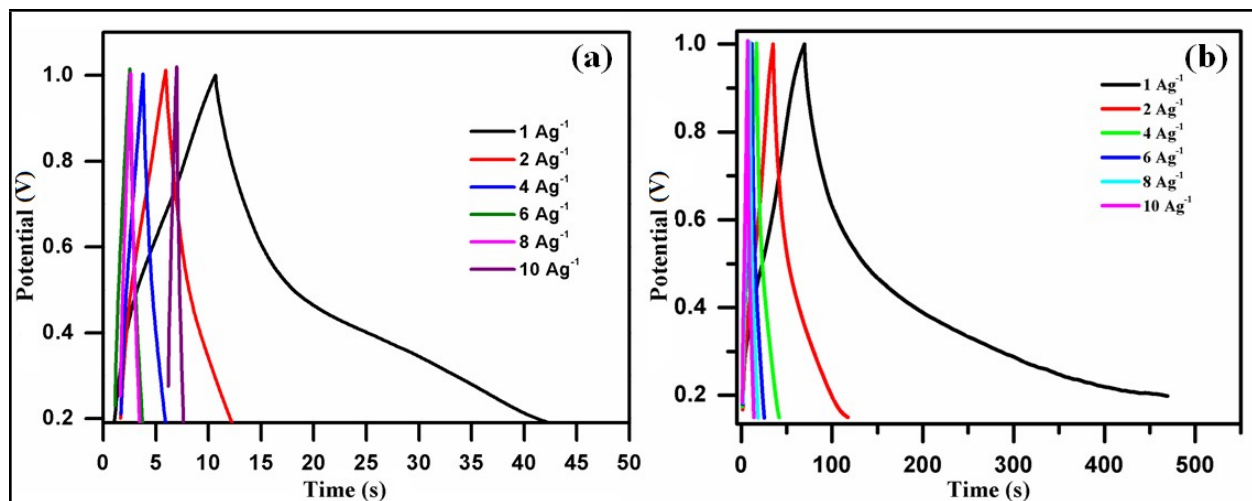

**Figure S9.** CD profiles of (a) CuO NPs, and (b) composite at different current density ranging from 1-10  $\text{A g}^{-1}$ .

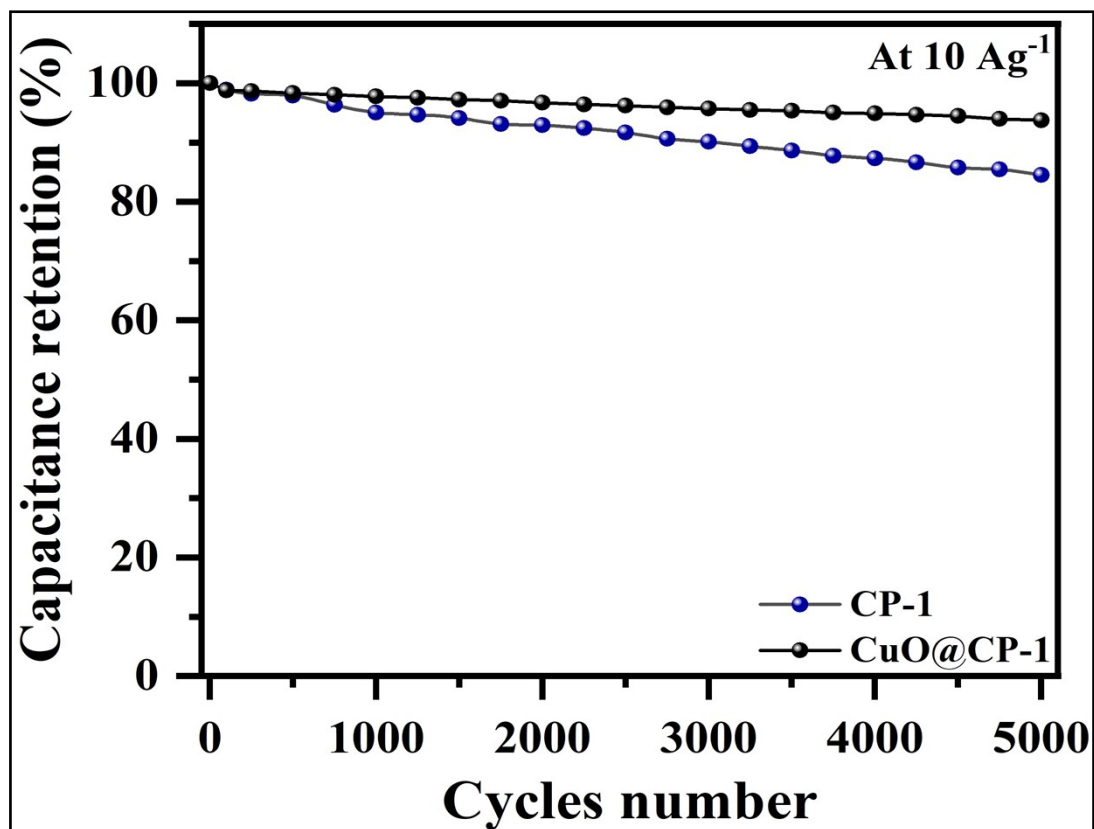

**Figure S10.** Cyclic stability of CP-1, CuO@CP-1 up to 5000 charge-discharge cycles at 10  $\text{A g}^{-1}$ .

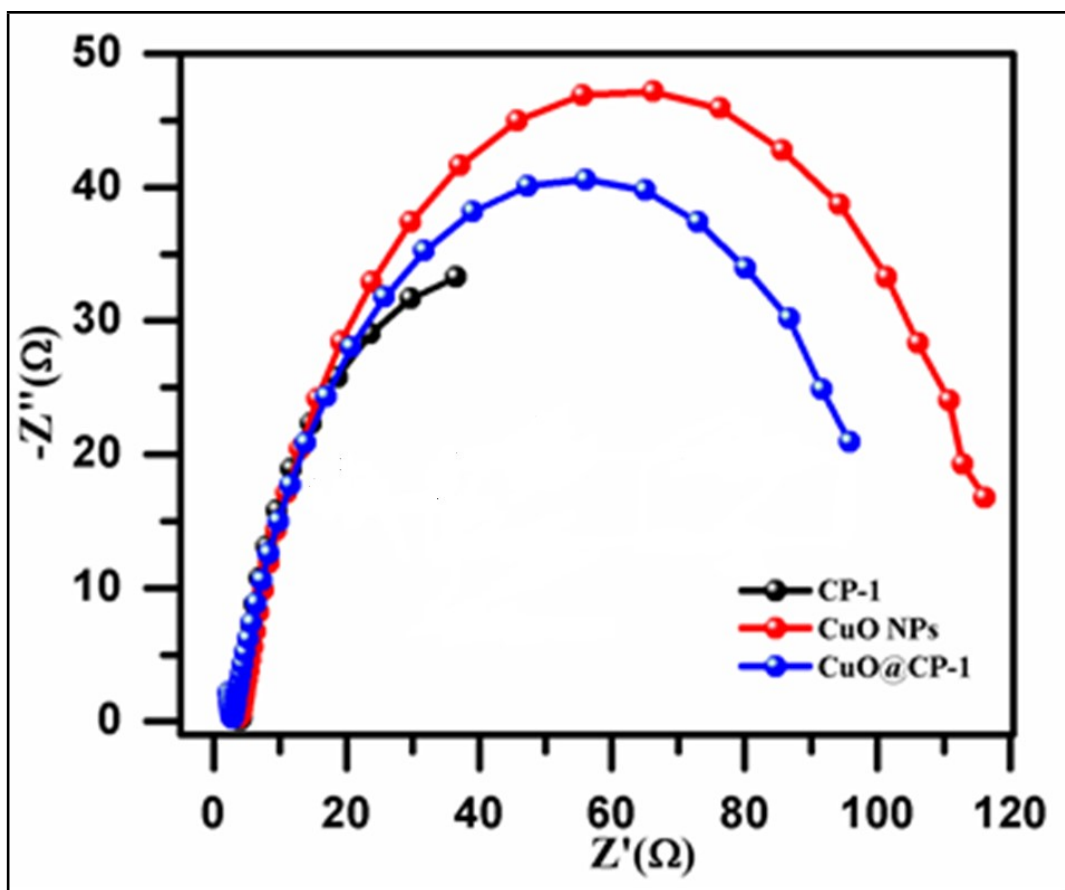

Figure S11. Nyquist plot of CP-1, CuO NPs and CuO@CP-1 electrode materials.

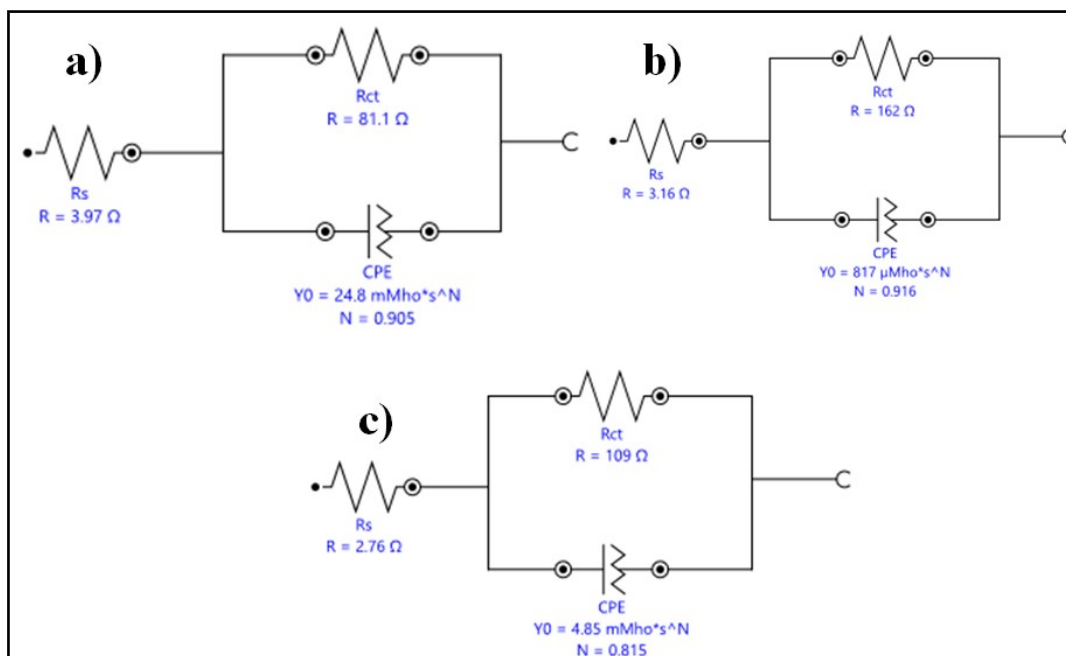

**Figure S12:** Equivalent circuits of the fabricated electrodes (a) CP-1, (b) CuO NPs (c) CuO@CP-1.

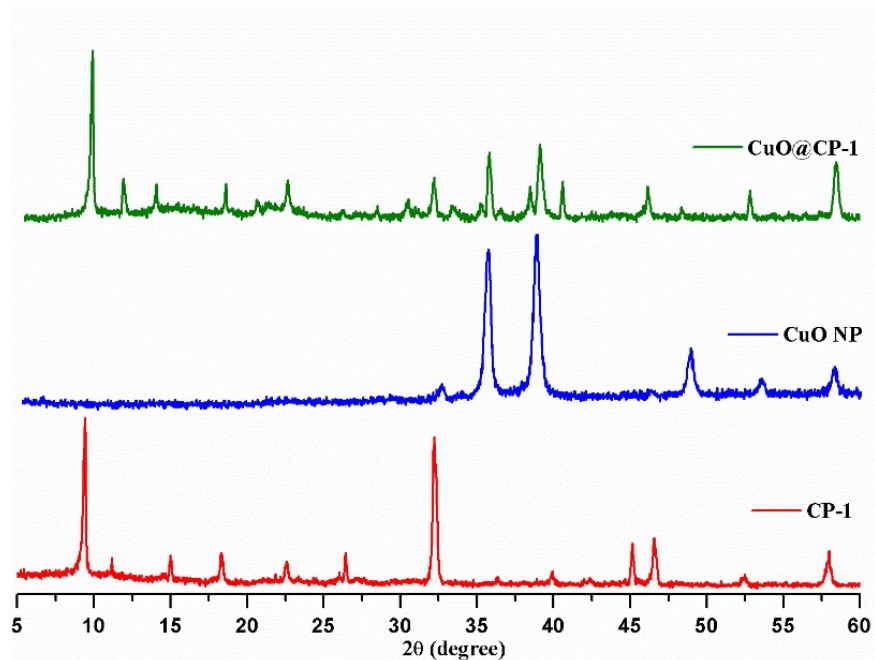

**Figure S13:** PXRD pattern (after electrochemical study) of CP-1, CuO NPs, and CuO@CP-1 electrode materials.

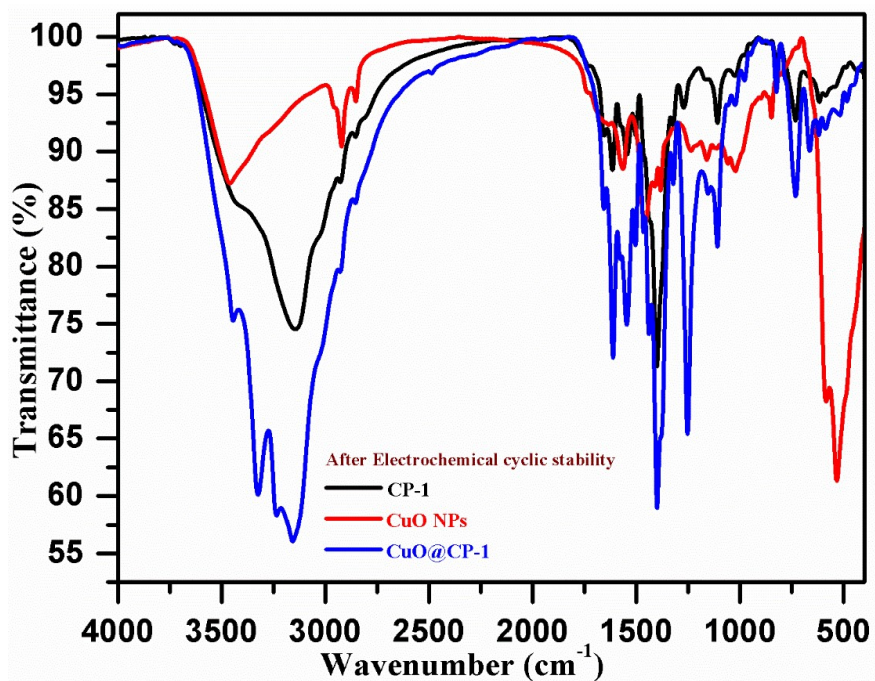

**Figure S14:** FTIR spectra (after electrochemical study) of CP-1, CuO NPs, and CuO@CP-1 electrode materials.
